# Supplementary material
Source: MDPI journal article supplement (https://www.mdpi.com/2071-1050/13/24/13842)
Supplement: s1 [file s1]

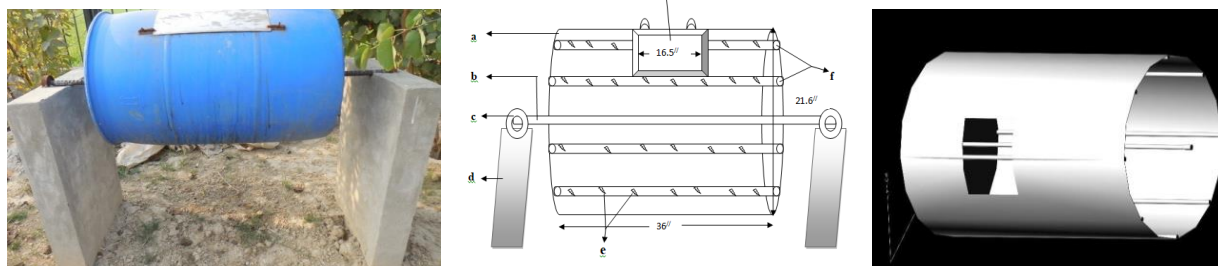

**Figure S1.** In- vessel composting system for compst and co-compost preparation, actual and schematic representation

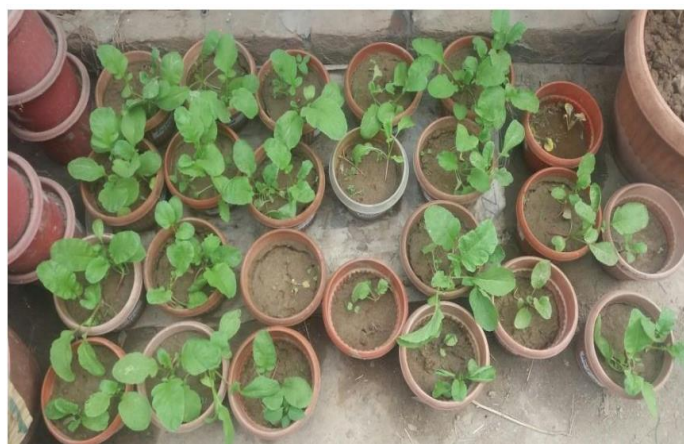

**Figure S2.** Pot experiment

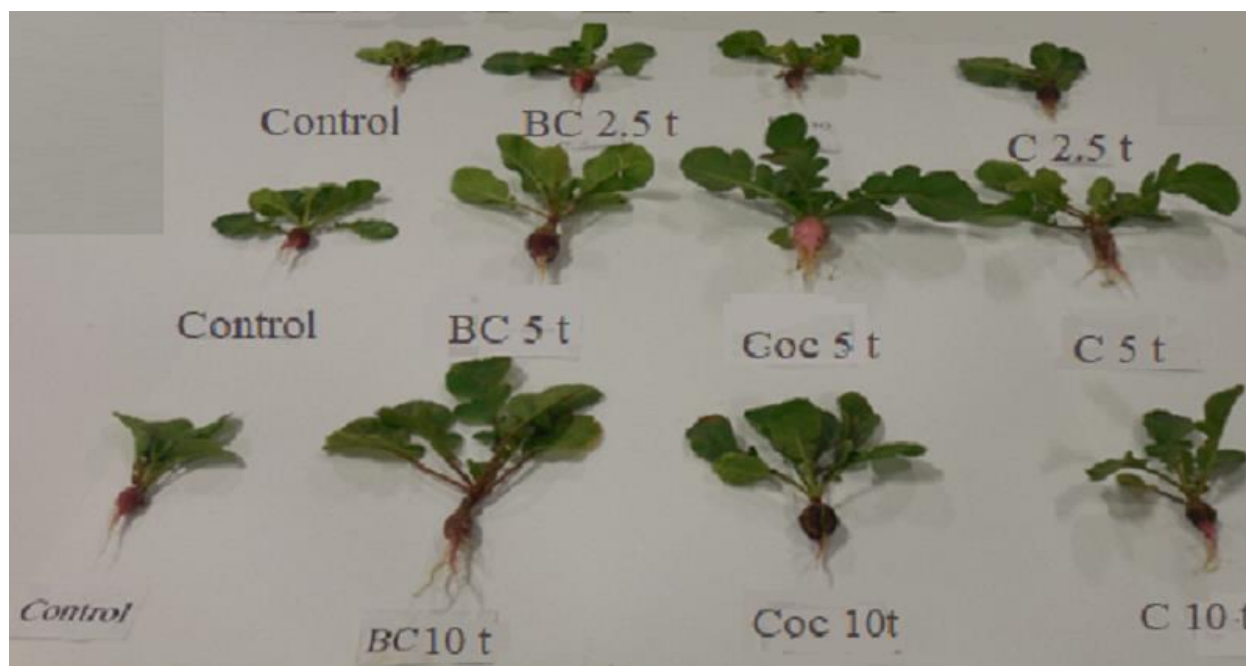

**Figure S3.** Plant agronomic characters
